# Supplementary material for: Cornelia de Lange Syndrome as Paradigm of Chromatinopathies
Source: Front Neurosci. 2021 Nov 5;15:774950. doi: 10.3389/fnins.2021.774950 (PMC8603810; doi:10.3389/fnins.2021.774950)
Supplement: Supplementary file 1 [file Table_1.XLSX]

## Sheet: Tabelle1
	Supplementary Table 1. Clinical features of CdLS-patients with mutations in non-cohesin genes
	Gene	Citation	Patient ID	Variant	Gender	Score	Phenotypes
	ANKRD11	Ansari et al., 2014	NA	c.6210_6211del; p.(Lys2070Asnfs*31)	f	NA	Atypical CdLS-like phenotype and normal head circumference
			NA	c.2627delT; p.(Leu876Profs*6)	f	NA	Normal head circumference
			Decipher DDD-EDB257747	60 kb intragenic deletion spanning exons 4-10 (chr16:89,351,798–89,412,086; hg19)	m	NA	Normal head circumference
		Parenti et al., 2016	Patient A	c.5483C>A; p.(Ser1828*)	f	(12)	Feeding difficulties, hypotonia, small brachycephalic head, low anterior hairline, open anterior fontanelle, broad and arched eyebrows, synophrys, long eyelashes, downslanting palpebral fissures, anteverted nares, depressed nasal bridge, long and smooth philtrum, thin lips with downturned corners of the mouth, short neck, small hands, mild brachydactyly, proximally set thumbs, mild micrognathia, …
			Patient B	c.2297_2300delAGAA; p.(Lys766Argfs*10)	m	(10)	Microcephaly at birth. A bilateral vesico-ureteral reflux was surgically treated in the first year of life. Kidney dysplasia, GER, auto- and hetero-aggression, epilepsy, low anterior hairline, broad and arched eyebrows with synophrys, long eyelashes, high nasal bridge, large nasal tip, long and smooth philtrum, large mouth with thin lips, macrodontia of superior central incisors, mild micrognathi…
		Aoi et al., 2019	Patient 21	c.3255_3256del; p.(Lys1086Glufs*15)	f	8	Synophrys, microcephaly, anteverted nostrils, depressed nasal bridge, thin upper lip, downturned corners of the mouth, DD, ADHD, hearing loss, GER
			Patient 43	c.5434C>T; p.(Gln1812*)	m	9	Synoprhys, long curly eyelashes, microcephaly, depressed nasal bridge, long philtrum, thin upper lip, downturned corners of the mouth, high palate, widely spaced teeth, pre-natal growth retardation, DD, ADHD, anxiety, seizures, cryptorchidism
		Cucco et al., 2020	Patient B	c.3224_3227del; p.(Glu1075Glyfs*242)	m	10	Long philtrum, thin lips, micrognathia, low anterior hairline, arched eyebrows, long eyelashes, synophrys, small hands, hirsutism, atrial septal defect, bilateral hypoacusis, moderate ID, behavioral issues such as aggression, defiance, extreme shyness, perseveration, and obsessive–compulsive behaviors
		Parenti et al., 2021	Patient 2	c.1711_1723del; p.(Thr571Alafs*15)	m	(9)	Low anterior hairline, arched eyebrows, long eyelashes, visual problems (lacrimal duct stenosis, strabismus), anteverted nostrils, broad nasal tip, long and smooth philtrum, downturned corners of the mouth, thin upper vermilion, thick lower vermilion, epicanthus, upslanting palpebral fissures, large protruding ears, rhinophonia aperta, velopharyngeal incompetence, muscolar hypotonia, small hands/…
			Patient 3	c.1977C>A; p.(Tyr659*)	f	(13)	Short stature, round/triangular facies, arched and thick eyebrows, synophrys, long eyelashes, visual problems (myopia, strabismus), anteverted nostrils, thick alae nasi, broad nasal tip, long philtrum, thin upper vermilion, macrodontia of central incisors, hypertrichosis, small hands/feet, brachydactyly, short 5th finger, syndactyly of toes, ID, behavioral issues, speech delay
			Patient 4	c.2398_2401delGAAA; p.(Glu800Asnfs*62)	f	(10)	Short stature, round/triangular facies, thick eyebrows, synophrys, anteverted nostrils, long philtrum, large mouth, macrodontia of central incisors, small hands/feet, brachydactyly, proximally set thumb, clinodactyly 5th finger, short 5th finger, hypoplasia distal phalanges of the 5th finger, ID, behavioral issues
			Patient 5	c.2408_2412del; p.(Lys803Argfs*5)	f	(13)	Post-natal growth retardation (short stature and secondary microcephaly), low anterior hairline, round/triangular facies, thick eyebrows, synophrys, anteverted nostrils, thick alae nasi, broad nasal tip, long philtrum, thin upper vermilion, hypertrichosis, small hands/feet, brachydactyly, proximally set thumbs, short 5th finger, hypoplasia of the distal phalanges of the 5th finger, hypoplastic na…
			Patient 6	c.2692C>T; p.(Arg898*)	f	(11)	Microcephaly, brachycephaly, low anterior hairline, flat facies, coarse facies, round/triangular facies, thick eyebrwos, synophrys, long eyelashes, visual problems, depressed nasal bridge, anteverted nostrils, broad nasal tip, long philtrum, large mouth, downturned corners of the mouth, thin upper vermilion, macrodontia of central incisors, delayed dentition, hypertrichosis, hairy elbows, hypopla…
			Patient 7	c.7356dupC; p.(Lys2453Glnfs*79)	f	(10)	Low anterior hairline, coarse facies, arched and thick eyebrows, synophrys, long eyelashes, anteverted nostrils, long philtrum, thin upper vermilion, hypertrichosis, proximally set thumbs, mild ID, mild motor delay, mild speech delay
			Patient 9	c.1903_1907del; p.(Lys635Glnfs*26)	m	(8)	Microcephaly, low anterior hairline, flat facies, round/triangular facies, arched and thick eyebrows, long eyelashes, anteverted nostrils, thick alae nasi, broad nasal tip, long and smooth philtrum, large mouth, thick lower vermilion, macrodontia of central incisors, small hands/feet, brachydactyly, clinodactyly 5th finger, short 5th finger, delayed bone age, genitourinary anomalies (cryptorchidi…
			Patient 12	c.7470+2T>C; p.?	m	(6)	Low anterior hairline, flat facies, triangular facies, arched and thick eyebrows, thick eyelashes, visual problems (retinopathy, strabismus), anteverted nostrils, broad nasal tip, long and smooth philtrum, thick lower vermilion, macrodontia of central incisors, hypertrichosis, brachydactyly, proximally set thumbs, delayed bone age, feeding problems in infancy, seizures, ID, behavioral issues (ADH…
	BRD4	Olley et al., 2018	Patient 3049	c.1289A>G; p.(Tyr430Cys)	f	(10)	Microcephaly, cardiac malformation (VSD), synophrys, arched eyebrows, short nose, long philtrum, ID, DD with absent speech, GER, hyp dysplasia
			Patient CDL038	c.1224delinsCA; p.(Glu408Aspfs*4)	f	(8)	Atypical CdLS-appearance with microcephaly, synophrys,short nose, long philtrum, ID, DD, myopia, blocked tear ducts
		Rentas et al., 2020	Patient CDL-022	c.1038G>C, p.(Lys346Asn)	m	NA	Moderate CdLS phenotype
	AFF4	Izumi et al., 2015	CHOPS T254S	c.761C>G; p.(Thr254Ser)	f	(3)	Round face, thick and coarse hair, long and full eyelashes, thick eyebrows with synophrys, hyperreflexia, chronic lung disease, sleep apnea, asthma, history of pneumonia, PDA with repair, pulmunary hypertension, delayed gastric emptying, constipation, splenomegaly, reflux, horseshoe kidney, brachydactyly, abnormal shape of vertebral bodies with descreased height, obesity, DD
			CHOPS T254A	c.760A>G; p.(Thr254Ala)	m	(7)	Thick and arched eyebrows with synophrys, hypertelorism, short nose with upturn, long philtrum, thickened tongue and high narrow palate, hearing loss, myopia and mild optic atrophy, subglottic stenosis, chronic lung disease, aspiration pneumonia, VSD, PDA with repair, reflux, cryptorchidism, bilateral ureteral reflux, brachydactyly, congenital fusion of vertebrae C2-C3, congenital hip subluxation…
			CHOPS R258W	c.772C>T; p.(Arg258Trp)	f	(6)	round face, synophrys, downturned corners of the mouth, cataract, congenital narrow oropharinx, chronic lung disease, obstructive sleep apnea, PDA., PFO, VSD, vescico-ureteral reflux, brachydactyly, microcephaly, obesity
	KMT2A	Yuan et al., 2015	CdLS-3	c.2233C>T; p.(Arg745*)	f	(13)	Pre-natal growth retardation, short stature, failure to thrive, microcephaly, thin and arched eyebrows, synoprhys, long curly eyelashes, narrow and downslanting palpebral fissures, epicanthal folds, hypertelorism, exotropia, low nasal bridge, long philtrum, thin upper lip, highly arched palate, micrognathia, downturned corners of the mouth, widely spaced teeth, dysmorphic ears, low posterior hair…
		Parenti et al., 2017	Patient 12	c.8590C>T; p.(Gln2864*)	m	(11)	Short stature, microcephaly, low anterior hairline, arched and thick eyebrows, synophrys, long eyelashes, ptosis, depressed nasal bridge, thick alae nasi, broad nasal tip, long and smooth philtrum, thin upper vermilion, hypertrichosis, hairy elbows, small hands, 5th finger clinodactyly, syndactyly of toes, CNS anomalies, ID, behavioral issues (noctural enuresis and encopresis), motor delay, speec…
		Aoi et al., 2019	Patient 27	c.3592C>T; p.(Gln1198*)	m	7	Synophrys, highly arched eyebrows, long curly eyelashes, thin upper lip, downturned corners of the mouth, short neck, growth retardation, ID, DD, ADHD, anxiety, proximally placed thumbs, hirsutism, hypospadias, GER
		Krawczynska et al., 2019	CdLS09	c.4012+1G>A; p.?	m	NA	Mild CdLS phenotype with microsomy, long eyelashes, low set ears, thin lips, highly arched palate, small hands and feet, 5th finger clinodactyly, hirsutism with the excessive hair growth near sacrum, mild DD with autistic-like behavior, speech impairment and feeding difficulties
		Demir et al., 2021	Case report	c.3647_3650delAAGA; p.(Lys1216Argfs*18)	f	(12)	Hypertrichosis, growth retardation, microcephaly, synophrys, ptosis, hypertelorism, thick eyebrows, long eyelashes, depressed and wide nasal bridge, long philtrum, thin upper lip vermilion, downturned corners of the mouth, highly arched palate, micrognathia, open fontanel, narrow forehead, tapered fingers, brachydactyly, 5th finger clinodactyly in her right and a single transverse palmar crease i…
	EP300	Woods et al., 2013	Case report	c.104_107del; p.(Ser35Tyrfs*12)	m	(14)	IUGR, patent ductus arteriosus and patent foramen ovale, hypospadias, severe and progressive rigid scoliosis, significant upper thoracic extroscoliosis and distal thoracic levoscoliosis, post-natal growth retardation, delayed bone age, hirsutism, low frontal hairline, microbrachycephaly, synophrys, arched eyebrows, long eyelashes, ptosis, narrow forehead, broad nasal bridge, short nose, anteverte…
		Aoi et al., 2019	Patient 6	c.7014_7028del; p.(His2338_Pro2342del)	f	9	Synophrys, highly arched eyebrows, long curly eyelashes, microcephaly, anteverted nostrils, thin upper lip, downturned corners of the mouth, short neck, high palate, growth retardation, ID, DD, ADHD, anxiety, ASD, aggression, self-injurious behavior, 5th finger clinodactyly, syndactyly, abnormal palmar crease, limited elbow extension, proximally placed thumbs, myopia, hearing loss, hirsutism
		Cucco et al., 2020	Patient A	c.4408dupA; p.(Met1470Asnfs*3)	f	9	Feeding difficulties (persistent crying, regurgitation, and poor weight gain), GER, micrognathia, hirsutism, synophrys, profound hearing loss (sensorineural and conductive), moderate–severe ID with an IQ of 49, post-natal growth retardation, severe speech delay, oppositional behaviors and low threshold of frustration tolerance
	SETD5	Parenti et al., 2017	Patient 2	c.2212_2213delAT; p.(Met738Valfs*27)	m	(9)	Low anterior hairline, broad and arched eyebrows, synophrys, smooth philtrum, frequent infections, ID, speech delay
			Patient 3	54 kb intragenic deletion spanning exons 3-19 (chr3:9,457,143-9,511,190; hg19)	f	NA	Thick eyebrows, long eyelashes, depressed nasal bridge, broad nasal tip, smooth philtrum, thin upper vermilion, feeding problems, ID, behavioral problems, severe motor and speech delay
		Aoi et al., 2019	Patient 12	c.1852C>T; p.(Arg618*)	f	10	Synophrys, highly arched eyebrows, long curly eyelashes, anteverted nostrils, depressed nasal bridge, long philtrum, thin upper lip, downturned corners of the mouth, short neck, growth retardation, ID, DD, ADHD, anxiety, ASD, VSD
	ARID1B	Yavarna et al., 2015	NA	c.372_395del; p.(Ala125_Ser132del)	NA	NA	Growth retardation/short stature, microcephaly, ID, seizures, hirsuitism, and dysmorphic facial features suggestive of CdLS or Bohring Opitz syndrome
		Parenti et al., 2017	Patient 5	c.2902C>T; p.(Arg968*)	f	(12)	Brachycephaly, low anterior hairline, arched eyebrows, thick eyebrows, synophrys, long eyelashes, visual problems, depressed nasal bridge, anteverted nostrils, thick alae nasi, broad nasal tip, long philtrum, thin upper vermilion, thick lower vermilion, delayed dentition, hypertrichosis, small hands and feet, proximally set thumbs, 5th finger clinodactyly, short 5th finger, joint laxity, cardiac …
			Patient 6	c.3505-2A>G; p.(Lys1169Leufs*18)	m	(11)	Microcephaly at birth, short stature, brachycephaly, sparse scalp hair, arched eyebrows, synophrys, long and smooth philtrum, thin upper vermilion, ID, behavioral issues, mild motor and speech delay
	SMARCB1	Parenti et al., 2017	Patient 4	c.971A>G; p.(Lys324Arg)	f	(13)	Pre-natal and post-natal growth retardation with microcephaly, low anterior hairline, sparse scalp hair, frontal bossing, arched and thick eyebrows, synophrys, long eyelashes, visual problems, depressed nasal bridge, thick alae nasi, broad nasal tip, long philtrum, downturned corners of the mouth, thin upper vermilion, small hands and feet, brachydactyly, 5th finger clinodactyly, hypoplastic nail…
	TAF1	O'Rawe et al., 2015	Individual 4A	c.1454T>A; p.(Ile485Asn)	m	(12)	Post-natal growth retardation, gross motor delay, delayed speech and language development, downslanted palpebral fissures, deeply set eyes, prominent forehead, synophrys, long philtrum, low-set ears, protruding ears, thin upper lip, pointed chin, anteverted nares, chronic otitis media, microcephaly, hypertelorism, hypoplasia of corpus callosum, hypotonia, unusual gluteal crease with sacral caudal…
		Cheng et al., 2019	Individual 13	c.3508C>T; p.(Arg1170Cys)	m	10	Typical CdLS craniofacial features, growth failure, ID, and limb malformations/anomalies, which include the classical preaxial hand oligodactyly/radial ray/upper limb anomaly
	USP7	Fountain et al., 2017	Patient 8	31 kb intragenic deletion including a portion of 5'UTR and intron 1 and the entire exon 1 (chr16:9,085,733-9,054,621; hg19)	f	(9)	DD, ID, behavioral issues, ASD, ADHD, facial dysmorphism, eye anomalies, feeding problems, GER, abnormal gait, short stature, scoliosis, contractures, small hands, small feet, hearing difficulties
	DDX23	Burns et al., 2021	Patient 5	c.1625G>A; p.(Arg542His)	f	(9)	Hypertrichosis, bushy eyebrows with synophrys, wide nostrils, long plain philtrum, thin lips, low set ears, global DD, hearing loss, ASD, radioulnar synostosis, shortened 5th fingers with camptodactyly bilaterally, gaps between the first and second toes, mild pulmonary stenosis, downturned corners of the mouth with a history of hypertonia, recurrent infections
			Patient 6	c.1583G>A; p.(Arg528His)	f	(11)	Cleft of the soft palate requiring surgical repair, pectus excavatum and proximal radioulnar synostosis in the right arm, diffuse hypotonia and significant oral dysphagia, global DD, seizure, heterotopic gray matter and corpus callosum dysplasia, cortical vision impairment with myopia and astigmatism, bitemporal narrowing, bulbous nasal tip, broad philtrum, full lips, downturned corners of the mo…
	CSNK1G1	Gold et al., 2020	Individual 4	c.419C>T; p.(Thr140Met)	m	(9)	Feeding diffculties, ocular hypertelorism with telecanthus, synophrys, long eyelashes, large low-set prominent ears, short nose, elongated prominent philtrum, thin upper lip, downturned corners of the mouth, high arched palate, micorgnathia, strabismus, lacrimal duct obstruction, misaligned teeth, GER, proximally set thumbs, 5th finger clinodactyly, scoliosis, isolated lateralized overgrowth of r…
	ZMYND11	Aoi et al., 2019	Patient 53	c.1438delG; p.(Asp480Thrfs*3)	m	15	Typical CdLS features including left hand oligodactyly, synophrys, highly arched eyebrows, curly long eyelashes, microcephaly, anteverted nostrils, long philtrum, thin upper lip, downturned corners of the mouth, micrognathia, pre- and post-natal growth retardation, ID, DD, anxiety, self-injurious behavior, absence of forearms, oligodactyly, abnormal palmar crease, myopia, hirsutism, cryptorchidis…
	MED13L	Aoi et al., 2019	Patient 5	c.6485C>A; p.(Thr2162Lys)	f	8	Broad/prominent forehead, bitemporal narrowing, full cheeks, microcephaly, synophrys, long curly eyelashes, anteverted nostrils, 5th finger clinodactyly, bradycardia, hypotonia, delayed walking, delayed speech, epilepsy, recurrent otitis, micrognathia, low set ears, growth retardation, ID, DD, ADHD, ASD, aggression, myopia, hirsutism, GER
	PHIP	Aoi et al., 2019	Patient 56	c.1156G>A; p.(Asp386Asn)	m	6	Synophrys, long curly eyelashes, anteverted nostrils, depressed nasal bridge, short neck, macrocephaly, pre-natal growth retardation, obesity, ID, DD, ADHD, anxiety, self-injurious behavior
	TAF6	Yuan et al., 2015	CdLS-4	c.247C>T; p.(Arg83Cys)	m	(11)	Short stature, microcephaly, narrow shoulders, single transverse palmar crease on the right hand, undescended testicle on the left, hirsutism, DD, ID, dysmorphic facial appearance including arched eyebrows with synophrys, long curly eyelashes, a widow’s peak, long philtrum, prominent nose, microstomia, and thin upper li
		Tuc et al., 2020	Individual VI-8	c.323T>C; p.(Ile108Thr)	m	4	Moderate ID, DD, mild dysmorphic features and stereotypic behavior involving bilateral repetitive movements of arms and hands, tapping shoulders, twirling of fingers
	NAA50	Aoi et al., 2019	Patient 19	c.93C>G; p.(Tyr31*)	m	12	Synophrys, highly arched eyebrows, long curly eyelashes, cleft palate, microcephaly, anterverted nostrils, depressed nasal bridge, long philtrum, thin upper lip, downturned corners of the mouth, pre- and post- natal growth retardation, DD, ADHD, anxiety, aggression, self-injurious behavior, small hands and feet, oligodactily, syndactyly, myopia, criptorchidism, hypoplastic genitalia, GER
	CREBBP	Tang et al., 2019	Patient 3	c.1715delG; p.(Gly572Glufs*17)	f	9	RSTS diagnosis with CdLS resemblance. Mild growth retardation, ID, speech dealy, arched eyebrows, synophrys, long eyelashes, strbismus, teeth hypoplasia, laryngeal cartilage dysplasia, finger or toe deformity (polydactyly of toes), hirsutism, low anterior hairline, hypoplastic maxilla, iris hypoplasia, broad nasal bridge, widely spaced incisors, hairy back and forehead
	PDGFRB	Yavarna et al., 2015	NA	c.1113C>G; p.(Asn371Lys)	NA	NA	Hyperactivity, autism, dysmorphic features, speech delay. A differential diagnosis of Cornelia de Lange syndrome was given
	GER: Gastro-esophageal reflux
	ID: Intellectual disability
	DD: Developmental delay
	ADHD: Attention deficit hyperactivity disorder
	CNS: Central nervous system
	VSD: Ventricular septal defect
	IUGR: Intrauterine growth retardation
	ASD: Autism spectrum disorder
	PDA: patent ductus arteriosus
	PFO: patent foramen ovale
